# Supplementary material
Source: PubMed Central journal article supplement (PMC7313361)
Supplement: ESO910047_simulate_non_v2.pdf [file ESO910047_simulate_non_v2.pdf]

\*-----\*

// Modified non-differential simulation program //

\*-----\*

\* Author: Peter J Godolphin

\* Version: 2

\* Date created: 14 March 2019

\* Last modified: 03 January 2020

\* Programmed in: Stata 15.1

/\* DESCRIPTION:

This program creates a dataset with a binary outcome. The parameters used to create this dataset can be modified to mimic specific trial circumstances. The program then misclassifies a random selection of the participants to ensure that the treatment effect remains constant. The outcome is analysed to produce a risk ratio and this output is produced, as is the number of misclassifications. \*/

/\* PARAMETERS:

- N: Sample size (set up for 3000)

- A: Event rate (set up for 10%)

- B: Proportion of events in control group (set up for 60%)

- C: Proportion of events in treatment group (set up for 40%)

// B & C are used to determine treatment effect, here it is 0.67

// Setting B to 0.55 and C to 0.45 will give 0.82

// Setting B to 0.525 and C to 0.475 will give 0.90

- X: Sets level of non-differential misclassification

// Users can increase X until the treatment effect is non significant \*/

\*-----\*

```
// START //
```

```
*-----*
```

```
capture program drop simulate_non
```

```
program define simulate_non
```

```
version 15.1
```

```
syntax, [N(int 3000) A(real 0.1) B(real 0.6) C(real 0.4) X(real 0)]
```

```
* Set up dataset with desired event rate and true treatment effect
```

```
clear
```

```
set obs `n'
```

```
qui gen refno = _n
```

```
qui gen trt = 1 if refno <= `n'/2
```

```
qui replace trt = 2 if refno > `n'/2
```

```
qui gen outcome = 1 if refno <= `n'*`a'*`b'
```

```
qui replace outcome = 1 if refno > `n'/2 & refno <= (`n'/2 + `n'*`a'*`c')
```

```
qui replace outcome = 0 if outcome == .
```

```
* Non-differential misclassification
```

```
set seed 1111
```

```
qui gen rand1 = runiform() if trt == 1 & outcome == 1
```

```
sort rand1
```

```
qui gen n1 = _n if trt == 1 & outcome == 1
```

```
qui replace outcome = 0 if n1 <= `b'*`x'*10
```

```
qui gen count1 = 1 if n1 <= `b'*`x'*10
```

```
qui gen rand2 = runiform() if trt == 2 & outcome == 1
```

```
sort rand2
```

```
qui gen n2 = _n if trt == 2 & outcome == 1
```

```
qui replace outcome = 0 if n2 <= `c'*`x'*10
```

```
qui gen count2 = 1 if n2 <= `c'*`x'*10
qui sum count1
gen c1 = `r(N)'
qui sum count2
qui gen c2 = `r(N)'
qui gen count = c1 + c2

glm outcome trt, family(binomial) link(log) eform

* Display the number of misclassifications
qui sum count
display as text "Total number of misclassifications: `r(mean)'"
end

*-----*
// END //
*-----*
```
