# Supplementary material
Source: PubMed Central journal article supplement (PMC7313361)
Supplement: ESO910047_Supplemental_Material.pdf [file ESO910047_Supplemental_Material.pdf]

**SUPPLEMENTARY MATERIAL:**

**Supplementary table 1a:** Functional outcome by treatment group using central adjudicator and site investigator data in REVASCAT

| Outcome | Central adjudicator data |                    | Site investigator data |                    |
|---------|--------------------------|--------------------|------------------------|--------------------|
|         | Treated<br>(n=103)       | Control<br>(n=103) | Treated<br>(n=103)     | Control<br>(n=103) |
| mRS 0   | 7                        | 6                  | 6                      | 3                  |
| mRS 1   | 18                       | 7                  | 23                     | 10                 |
| mRS 2   | 20                       | 16                 | 20                     | 16                 |
| mRS 3   | 19                       | 20                 | 15                     | 20                 |
| mRS 4   | 8                        | 17                 | 7                      | 15                 |
| mRS 5/6 | 31                       | 37                 | 32                     | 39                 |

mRS refers to modified Rankin Scale

**Supplementary table 1b:** Agreement on functional outcome between central adjudicators and site investigators in REVASCAT

|                          | Central Adjudicators |       |        |         |         |         |         |
|--------------------------|----------------------|-------|--------|---------|---------|---------|---------|
| Site Investigators       | mRS 0                | mRS 1 | mRS 2  | mRS 3   | mRS 4   | mRS 5/6 | Total   |
| mRS 0                    | 9                    | 0     | 0      | 0       | 0       | 0       | 9       |
| mRS 1                    | 4                    | 25    | 3      | 1       | 0       | 0       | 33      |
| mRS 2                    | 0                    | 0     | 33     | 3       | 0       | 0       | 36      |
| mRS 3                    | 0                    | 0     | 0      | 35      | 0       | 0       | 35      |
| mRS 4                    | 0                    | 0     | 0      | 0       | 22      | 0       | 22      |
| mRS 5/6                  | 0                    | 0     | 0      | 0       | 3       | 68      | 71      |
| <b>Total</b>             | 13                   | 25    | 36     | 39      | 25      | 68      | 206     |
| <b>Disagreements (%)</b> | 4 (31%)              | 0 (-) | 3 (8%) | 4 (10%) | 3 (12%) | 0 (-)   | 14 (7%) |

Crude agreement = 192/206 = 93%, unweighted kappa = 0.91, weighted kappa using linear weights = 0.96. mRS refers to modified Rankin Scale

**Supplementary table 1c:** Functional outcome by treatment group using central adjudicator and misclassified site investigator data in REVASCAT

| Outcome | Central adjudicator data |                 | Example misclassified site investigator data |                 |
|---------|--------------------------|-----------------|----------------------------------------------|-----------------|
|         | Treated (n=103)          | Control (n=103) | Treated (n=103)                              | Control (n=103) |
| mRS 0   | 7                        | 6               | 14                                           | 3               |
| mRS 1   | 18                       | 7               | 15                                           | 7               |
| mRS 2   | 20                       | 16              | 21                                           | 11              |
| mRS 3   | 19                       | 20              | 19                                           | 20              |
| mRS 4   | 8                        | 17              | 14                                           | 19              |
| mRS 5/6 | 31                       | 37              | 20                                           | 43              |

Misclassified site investigator data is from one of 1000 simulations (starting seed 2206). mRS refers to modified Rankin Scale

**Supplementary table 1d:** Agreement on functional outcome between central adjudicators and example misclassified site investigators in REVASCAT (data from one of 1000 simulations)

|                          | Central Adjudicators |          |          |          |          |          |          |
|--------------------------|----------------------|----------|----------|----------|----------|----------|----------|
| Site Investigators       | mRS 0                | mRS 1    | mRS 2    | mRS 3    | mRS 4    | mRS 5/6  | Total    |
| mRS 0                    | 10                   | 7        | 0        | 0        | 0        | 0        | 17       |
| mRS 1                    | 3                    | 15       | 4        | 1        | 0        | 0        | 22       |
| mRS 2                    | 0                    | 3        | 24       | 5        | 0        | 0        | 32       |
| mRS 3                    | 0                    | 0        | 8        | 26       | 4        | 1        | 39       |
| mRS 4                    | 0                    | 0        | 0        | 8        | 15       | 10       | 33       |
| mRS 5/6                  | 0                    | 0        | 0        | 0        | 6        | 57       | 63       |
| <b>Total</b>             | 13                   | 25       | 36       | 39       | 25       | 68       | 206      |
| <b>Disagreements (%)</b> | 3 (23%)              | 10 (40%) | 12 (33%) | 14 (36%) | 10 (40%) | 11 (16%) | 60 (29%) |

Mean crude agreement (SD) = 72.2% (2.80%), mean unweighted kappa (SD) = 0.65 (0.03), mean weighted kappa using linear weights (SD) = 0.84 (0.02). Mean crude agreement, unweighted and weighted kappa are from 1000 simulations (starting seed 2206). mRS refers to modified Rankin Scale

**Supplementary table 2a:** Functional outcome by treatment group using central adjudicator and site investigator data in TARDIS

| Outcome             | Central adjudicator data |                     | Site investigator data |                     |
|---------------------|--------------------------|---------------------|------------------------|---------------------|
|                     | Treated<br>(n=1556)      | Control<br>(n=1540) | Treated<br>(n=1556)    | Control<br>(n=1540) |
| No recurrent event  | 1463                     | 1435                | 1457                   | 1434                |
| TIA                 | 32                       | 48                  | 34                     | 53                  |
| Stroke: mRS 0/1     | 15                       | 18                  | 16                     | 16                  |
| Stroke: mRS 2/3     | 22                       | 23                  | 23                     | 22                  |
| Stroke: mRS 4/5     | 11                       | 9                   | 13                     | 10                  |
| Fatal stroke: mRS 6 | 13                       | 7                   | 13                     | 5                   |

mRS refers to modified Rankin Scale

**Supplementary table 2b:** Agreement on incidence and severity of stroke between central adjudicators and site investigators in TARDIS

|                          | Central Adjudicators |        |                 |                 |                 |                     |         |
|--------------------------|----------------------|--------|-----------------|-----------------|-----------------|---------------------|---------|
| Site Investigators       | No recurrent event   | TIA    | Stroke: mRS 0/1 | Stroke: mRS 2/3 | Stroke: mRS 4/5 | Fatal stroke: mRS 6 | Total   |
| No recurrent event       | 2881                 | 1      | 3               | 4               | 0               | 2                   | 2891    |
| TIA                      | 5                    | 77     | 4               | 1               | 0               | 0                   | 87      |
| Stroke: mRS 0/1          | 4                    | 2      | 26              | 0               | 0               | 0                   | 32      |
| Stroke: mRS 2/3          | 5                    | 0      | 0               | 40              | 0               | 0                   | 45      |
| Stroke: mRS 4/5          | 3                    | 0      | 0               | 0               | 20              | 0                   | 23      |
| Fatal stroke: mRS 6      | 0                    | 0      | 0               | 0               | 0               | 18                  | 18      |
| <b>Total</b>             | 2898                 | 80     | 33              | 45              | 20              | 20                  | 3096    |
| <b>Disagreements (%)</b> | 17 (1%)              | 3 (4%) | 7 (21%)         | 5 (11%)         | 0 (-)           | 2 (10%)             | 34 (1%) |

Crude agreement = 3062/3096 = 98.9%, unweighted kappa = 0.91, weighted kappa using linear weights = 0.91. TIA refers to Transient Ischaemic Attack, mRS refers to modified Rankin Scale

**Supplementary table 2c:** Functional outcome by treatment group using central adjudicator and misclassified site investigator data in TARDIS

| Outcome             | Central adjudicator data |                  | Example misclassified site investigator data |                  |
|---------------------|--------------------------|------------------|----------------------------------------------|------------------|
|                     | Treated (n=1556)         | Control (n=1540) | Treated (n=1556)                             | Control (n=1540) |
| No recurrent event  | 1463                     | 1435             | 1472                                         | 1403             |
| TIA                 | 32                       | 48               | 31                                           | 58               |
| Stroke: mRS 0/1     | 15                       | 18               | 16                                           | 26               |
| Stroke: mRS 2/3     | 22                       | 23               | 17                                           | 31               |
| Stroke: mRS 4/5     | 11                       | 9                | 10                                           | 12               |
| Fatal stroke: mRS 6 | 13                       | 7                | 10                                           | 10               |

Misclassified site investigator data is from one of 1000 simulations (starting seed 2206). mRS refers to modified Rankin Scale

**Supplementary table 2d:** Example agreement on incidence and severity of stroke between central adjudicators and misclassified site investigators in TARDIS (data from one of 1000 simulations)

|                                  | Central Adjudicators |        |                 |                 |                 |                     |         |
|----------------------------------|----------------------|--------|-----------------|-----------------|-----------------|---------------------|---------|
| Misclassified site Investigators | No recurrent event   | TIA    | Stroke: mRS 0/1 | Stroke: mRS 2/3 | Stroke: mRS 4/5 | Fatal stroke: mRS 6 | Total   |
| No recurrent event               | 2866                 | 4      | 0               | 4               | 0               | 1                   | 2875    |
| TIA                              | 10                   | 76     | 2               | 0               | 0               | 1                   | 89      |
| Stroke: mRS 0/1                  | 8                    | 0      | 31              | 2               | 1               | 0                   | 42      |
| Stroke: mRS 2/3                  | 8                    | 0      | 0               | 39              | 1               | 0                   | 48      |
| Stroke: mRS 4/5                  | 3                    | 0      | 0               | 0               | 18              | 1                   | 22      |
| Fatal stroke: mRS 6              | 3                    | 0      | 0               | 0               | 0               | 17                  | 20      |
| <b>Total</b>                     | 2898                 | 80     | 33              | 45              | 20              | 20                  | 3096    |
| <b>Disagreements (%)</b>         | 32 (1%)              | 4 (5%) | 2 (6%)          | 6 (13%)         | 2 (10%)         | 3 (15%)             | 49 (2%) |

Mean crude agreement (SD) = 98.1% (0.24%), mean unweighted kappa (SD) = 0.85 (0.02), mean weighted kappa using linear weights (SD) = 0.87 (0.02). Mean crude agreement, unweighted and weighted kappa are from 1000 simulations (starting seed 2206). TIA refers to Transient Ischaemic Attack, mRS refers to modified Rankin Scale



**Supplementary Table 3:** Number and proportion of non-differentially misclassified events required such that treatment effect is no longer significant at 5% level

|                                               |                       | Overall event rate  |                       |                       |                       |                       |                       |
|-----------------------------------------------|-----------------------|---------------------|-----------------------|-----------------------|-----------------------|-----------------------|-----------------------|
| Proportion of events:<br>Treatment vs Control |                       | 10%                 | 15%                   | 20%                   | 30%                   | 40%                   | 50%                   |
| <b>N=10000</b>                                | <b>60% vs 40%</b>     | 910/1000<br>(91%)   | 1410/2000<br>(94%)    | 1910/2000<br>(95.5%)  | 2910/3000<br>(97%)    | 3910/4000<br>(97.75%) | 4910/5000<br>(98.2%)  |
|                                               | <b>55% vs 45%</b>     | 629/1000<br>(62.9%) | 1129/1500<br>(75.27%) | 1629/2000<br>(81.45%) | 2629/3000<br>(87.63%) | 3629/4000<br>(90.73%) | 4629/5000<br>(92.58%) |
|                                               | <b>52.5% vs 47.5%</b> | NA                  | 169/1500<br>(11.27%)  | 680/2000<br>(34%)     | 1680/3000<br>(56%)    | 2680/4000<br>(67%)    | 3690/5000<br>(73.8%)  |
| <b>N=5000</b>                                 | <b>60% vs 40%</b>     | 405/500<br>(81%)    | 660/750<br>(88%)      | 905/1000<br>(90.5%)   | 1405/1500<br>(93.63%) | 1905/2000<br>(95.25%) | 2405/2500<br>(96.2%)  |
|                                               | <b>55% vs 45%</b>     | 149/500<br>(29.8%)  | 400/750<br>(53.33%)   | 649/1000<br>(64.9%)   | 1149/1500<br>(76.6%)  | 1649/2000<br>(82.45%) | 2149/2500<br>(85.96%) |
|                                               | <b>52.5% vs 47.5%</b> | NA                  | NA                    | NA                    | 329/1500<br>(21.93%)  | 829/2000<br>(41.45%)  | 1329/2500<br>(53.16%) |
| <b>N=3000</b>                                 | <b>60% vs 40%</b>     | 210/300<br>(70%)    | 360/450<br>(80%)      | 510/600<br>(85%)      | 810/900<br>(90%)      | 1110/1200<br>(92.5%)  | 1410/1500<br>(94%)    |
|                                               | <b>55% vs 45%</b>     | NA                  | 109/450<br>(24.22%)   | 260/600<br>(43%)      | 560/900<br>(62%)      | 860/1200<br>(71.63%)  | 1160/1500<br>(77.33%) |
|                                               | <b>52.5% vs 47.5%</b> | NA                  | NA                    | NA                    | NA                    | 200/1200<br>(17%)     | 499/1200<br>(41.6%)   |
| <b>N=2000</b>                                 | <b>60% vs 40%</b>     | 110/200<br>(55%)    | 210/300<br>(70%)      | 310/400<br>(77.5%)    | 510/600<br>(85%)      | 710/800<br>(88.75%)   | 910/1000<br>(91%)     |
|                                               | <b>55% vs 45%</b>     | NA                  | NA                    | 80/400<br>(20%)       | 280/600<br>(46.67%)   | 480/800<br>(60%)      | 680/1000<br>(68%)     |
|                                               | <b>52.5% vs 47.5%</b> | NA                  | NA                    | NA                    | NA                    | NA                    | 129/1000<br>(12.9%)   |
| <b>N=1000</b>                                 | <b>60% vs 40%</b>     | 15/100<br>(15%)     | 70/150<br>(46.67%)    | 115/200<br>(57.5%)    | 215/300<br>(71.63%)   | 315/400<br>(78.75%)   | 415/500<br>(83%)      |
|                                               | <b>55% vs 45%</b>     | NA                  | NA                    | NA                    | 29/300<br>(9.67%)     | 129/400<br>(32.25%)   | 229/500<br>(45.8%)    |
|                                               | <b>52.5% vs 47.5%</b> | NA                  | NA                    | NA                    | NA                    | NA                    | NA                    |

Data are number of events misclassified/total number of events (%)

Significant treatment effect is set at  $\alpha=0.05$  and is from a risk ratio

Proportion of events 60% vs 40% corresponds to a treatment effect of 0.67, a proportion of events 55% to 45% corresponds to a treatment effect of 0.82, and a proportion of events 52.5% to 47.5% corresponds to a treatment effect of 0.90. A treatment effect less than one indicates treatment is beneficial.

NA refers to scenarios where the initial treatment effect before misclassification was non-significant ( $p>0.05$ )

**Supplemental figure 1:** Amount of non-differential misclassification required such that treatment effect (relative risk=0.67) is no longer significant at 5% level for various sample sizes and overall event rates

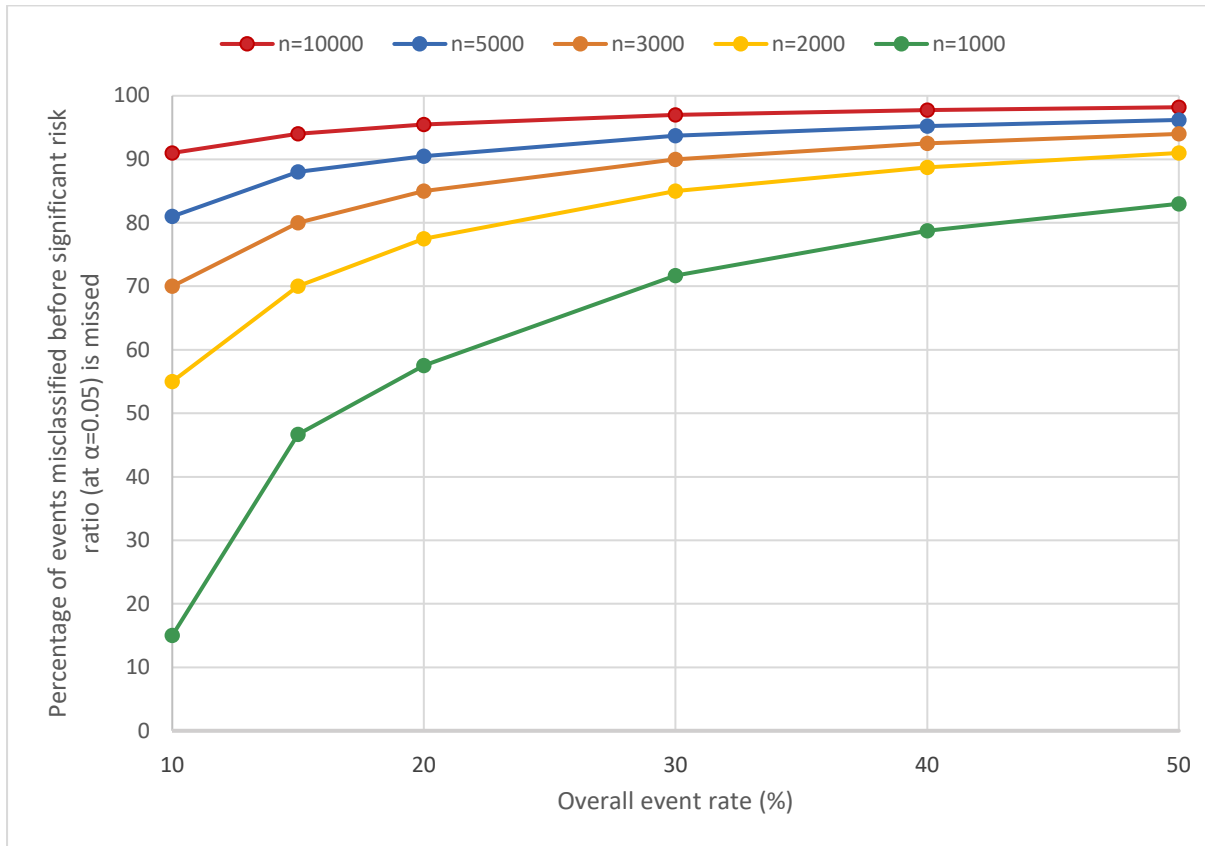

n refers to hypothetical trial sample size

**Supplemental figure 2:** Amount of non-differential misclassification required such that treatment effect (relative risk=0.90) is no longer significant at 5% level for various sample sizes and overall event rates

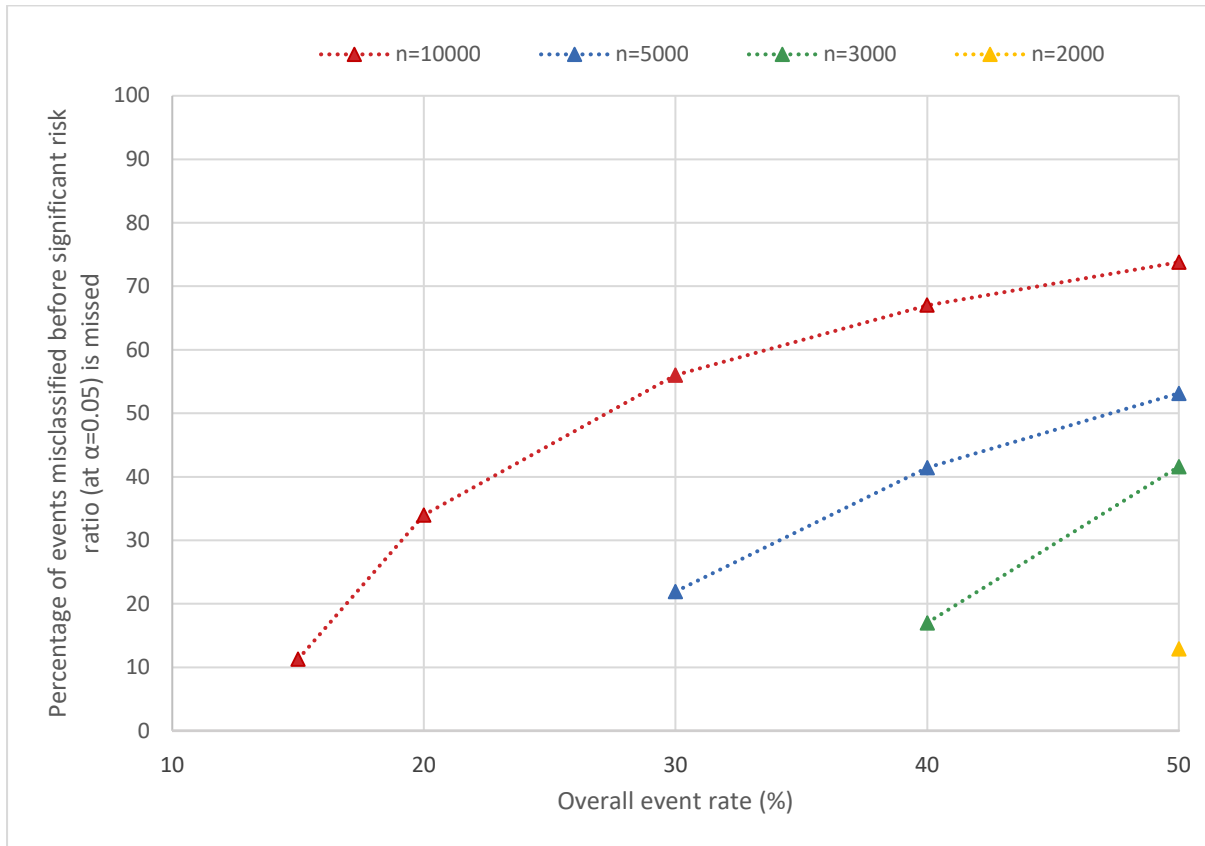

Missing scenarios are due to the initial treatment effect before misclassification being non-significant ( $p > 0.05$ ). n refers to hypothetical trial sample size
